# Supplementary material
Source: PubMed Central journal article supplement (PMC2757190)

## **Supplemental Figure Legends**

### **Supplemental Figure 1. Levels of STAT3 phosphorylated on tyrosine 705 in IFN $\gamma$ -treated OSCCs.**

Cells were treated with or without IFN $\gamma$  (10 ng/ml) for 1 hour before the preparation of total cell lysates. Sample lysates (20  $\mu$ g per lane) were subjected to electrophoresis, followed by western blotting with the indicated antibodies. Similar results were obtained from three separate experiments.

### **Supplemental Figure 2. Time course of phosphorylated Akt in IFN $\gamma$ -treated HSC-2 and Ca9-22 cells.**

Cells were pre-cultured for 24 hours in culture medium supplemented with 0.5% FBS for serum-starvation, and were then treated with IFN $\gamma$  (10 ng/ml) for the indicated time periods before preparation of total cell lysate. Sample lysates (20  $\mu$ g per lane) were subjected to electrophoresis followed by western blotting with the indicated antibodies. Similar results were obtained from three separate experiments.

### **Supplemental Figure 3. Effect of proteasome inhibition on IFN $\gamma$ -mediated down-regulation of CcnA2 and Cdk2 expression.**

Cells were pre-treated with or without the proteasome inhibitor MG132 (50  $\mu$ M) for 1 hour, and then were stimulated with IFN $\gamma$  (10 ng/ml) for 24 hrs before cell lysates were prepared. Equal amounts of cellular protein (20  $\mu$ g/lane) were analyzed by western blotting, as described above. Similar results were obtained in three separate experiments.

### Supplemental Figure 1

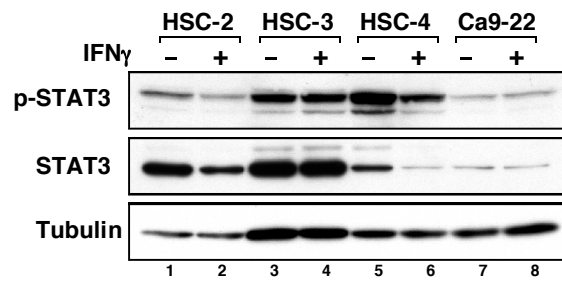

Supplement: supp_M109.025932_jbc.M109.025932-1.pdf [file supp_M109.025932_jbc.M109.025932-1.pdf]
